# Supplementary material
Source: Springer Nature journal article supplement (https://www.springermedizin.de/resource/supplementary/12884_2006_97_MOESM5_ESM.pdf/9459618)

## Odds ratio meta-analysis plot [random effects]

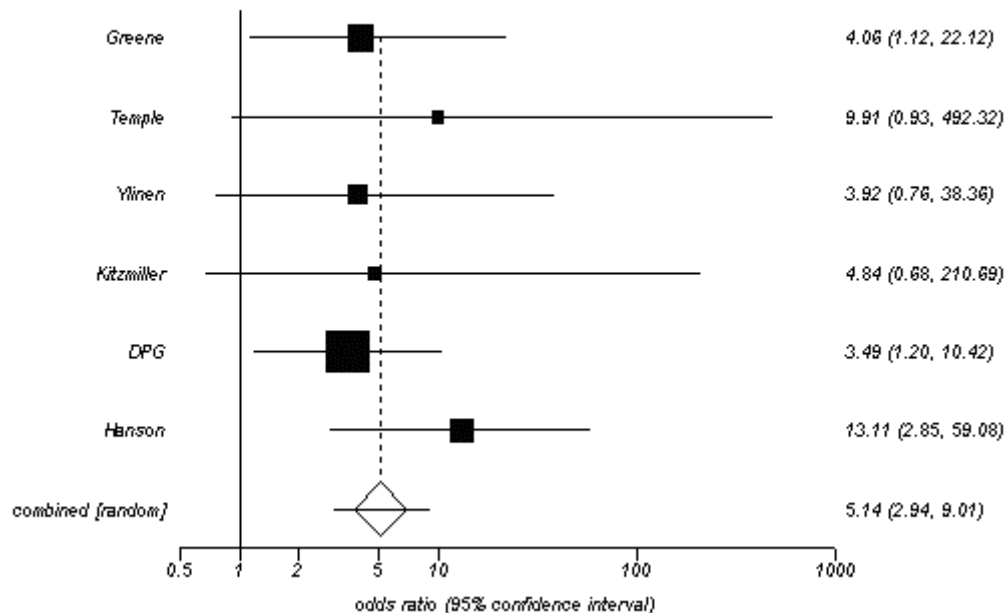

Supplement: MOESM5 [file 9459618]
